# Supplementary material for: Metal(ii)-directed self-assembly of amino acid functionalized polyoxometalates
Source: Royal Society of Chemistry journal article supplement (doi:10.1039/c3ce40129d), 2013-01-01
Supplement: c3ce40129d.pdf [file c3ce40129d.pdf]

## Electronic Supporting Information

### Metal(II)-directed self-assembly of amino acid functionalized polyoxometalates

Zhaofei Chen, Haiyan An,\* Hua Zhang, Ying Hu

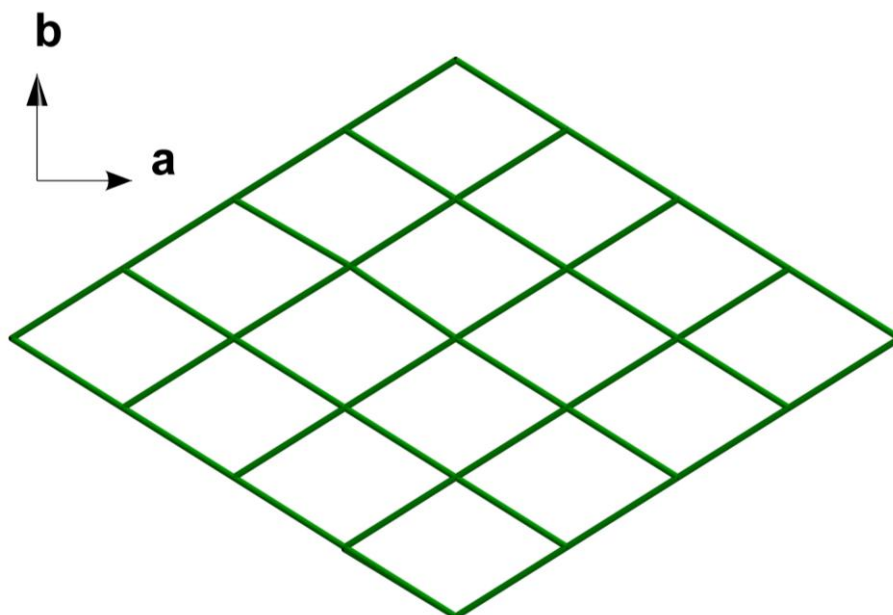

**Fig. S1** Schematic representation of the 4<sup>4</sup> topology of **1**.

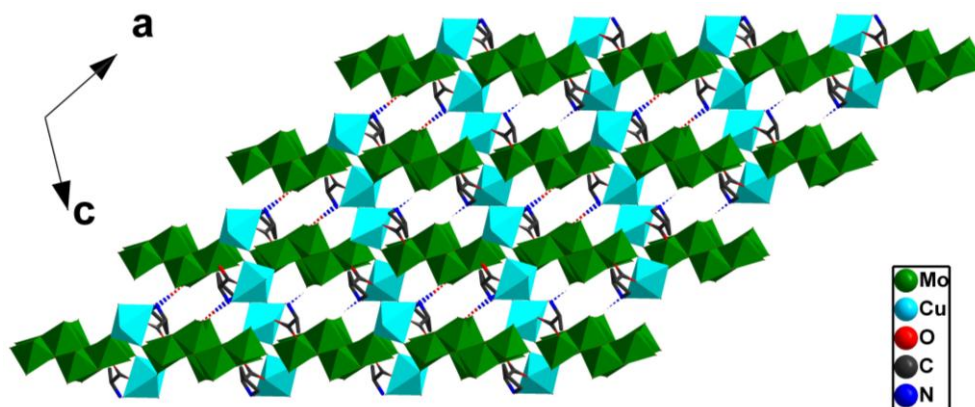

**Fig. S2** View of the 3D superamolecular framework in **1**, showing the hydrogen bonds between the neighboring layers.

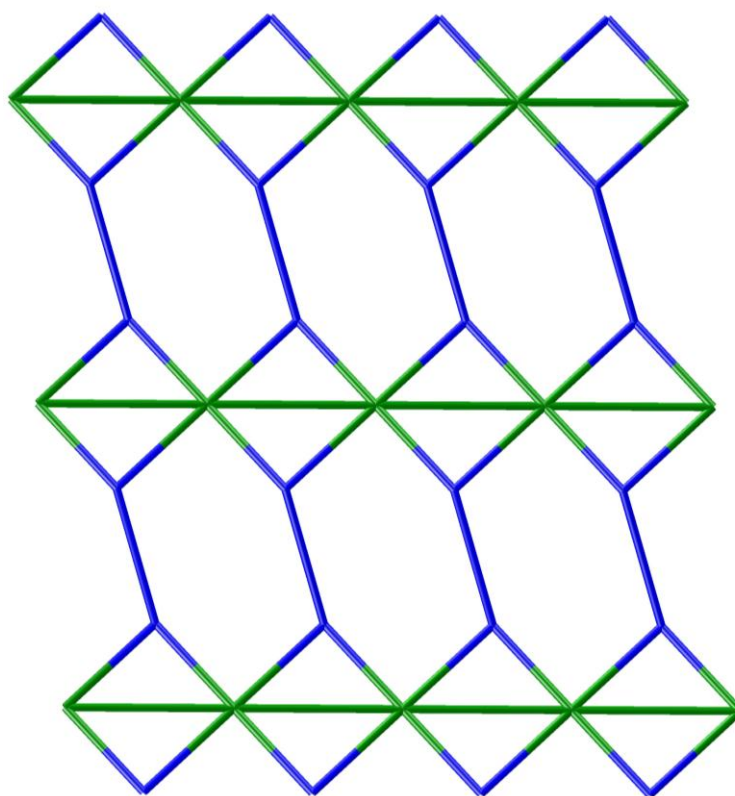

**Fig. S3** Schematic representation of (3,6)-connected net with Schläfli symbol  $(3 \cdot 6^2)_2(3^4 \cdot 4^2 \cdot 6^2 \cdot 7^4 \cdot 8^3)$  in **4**.

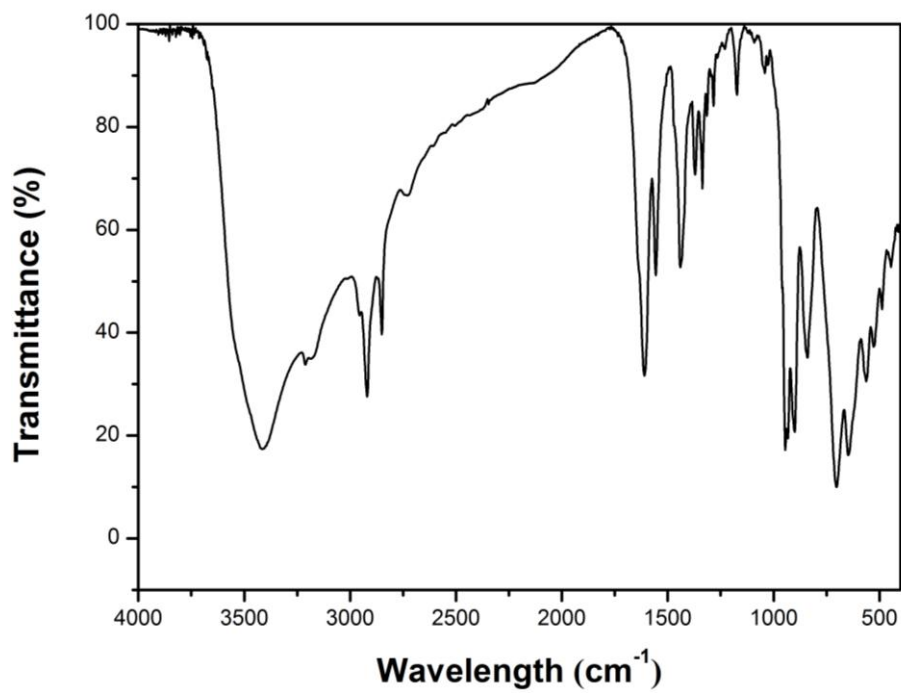

(a)

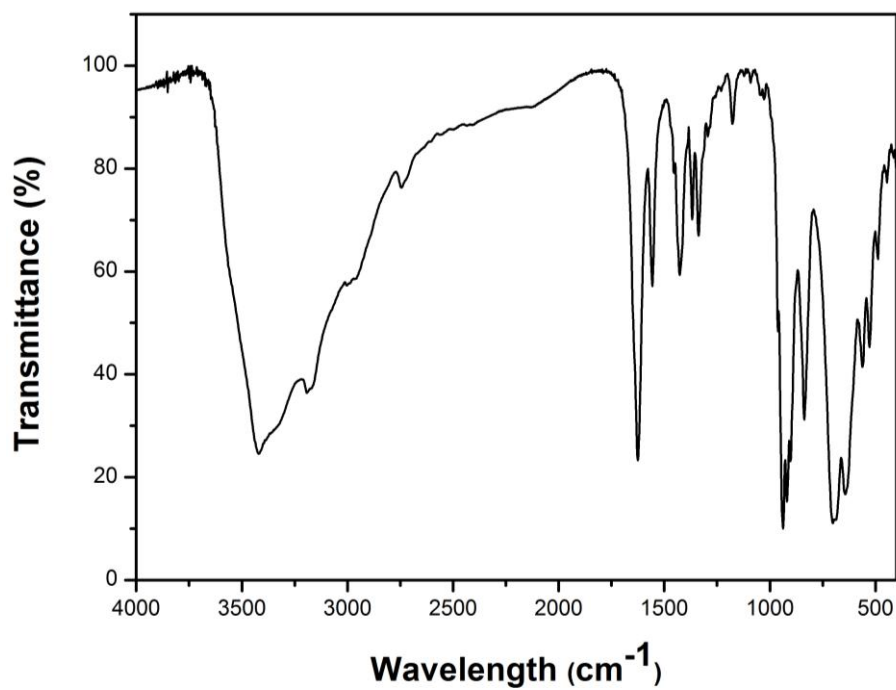

(b)

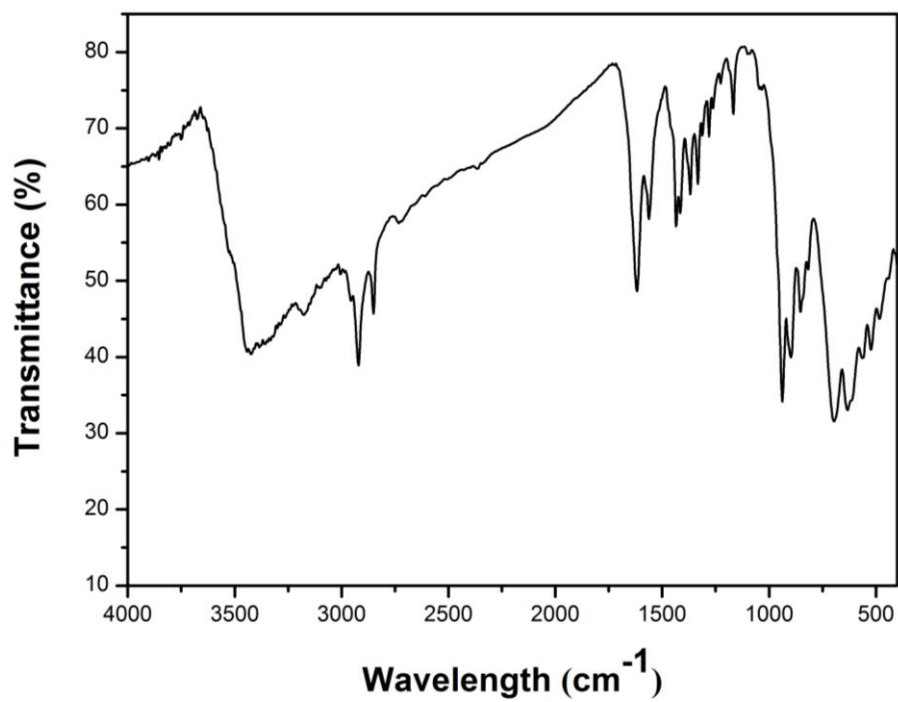

(c)

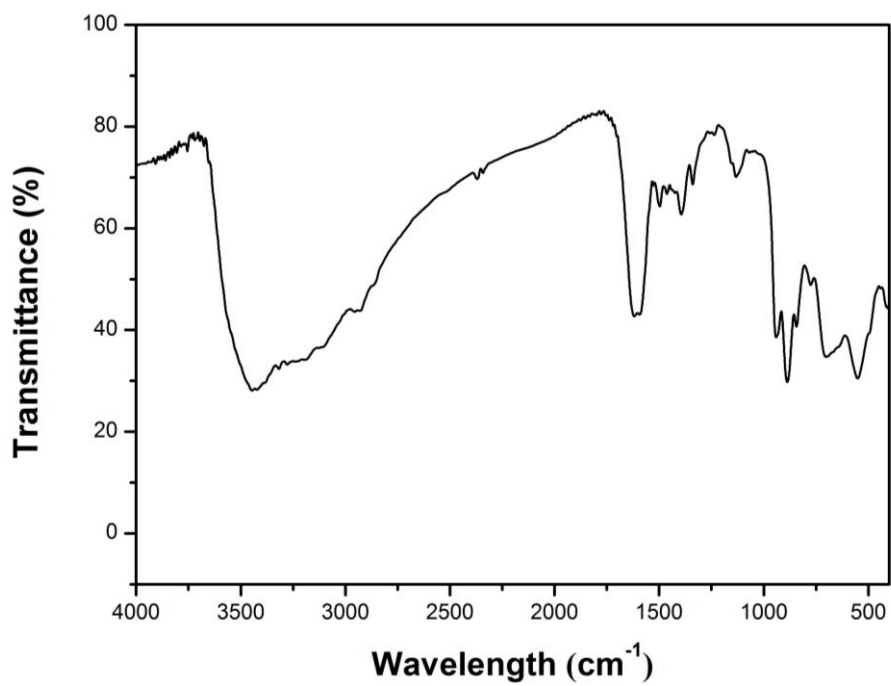

(d)

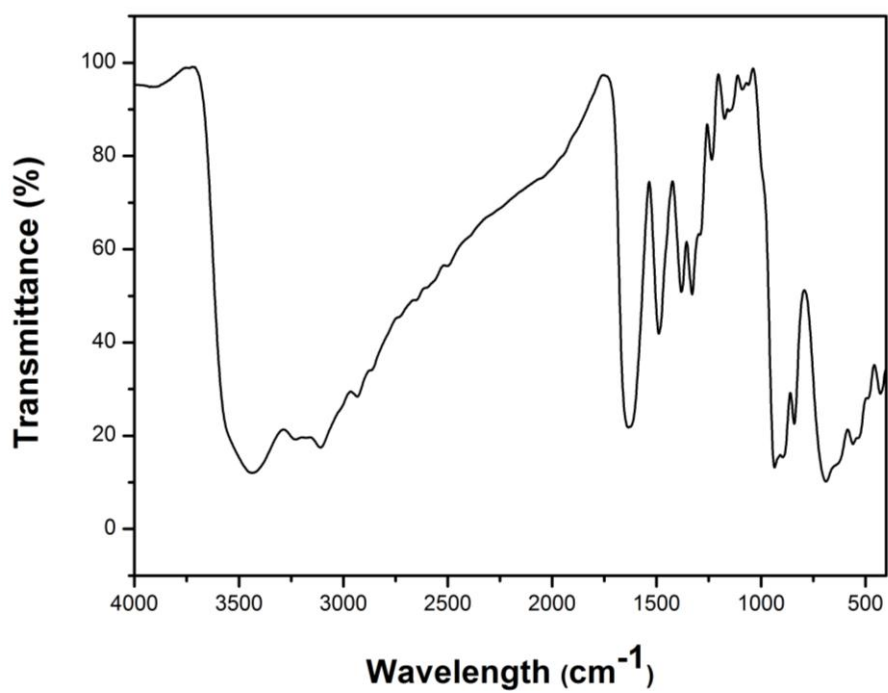

(e)

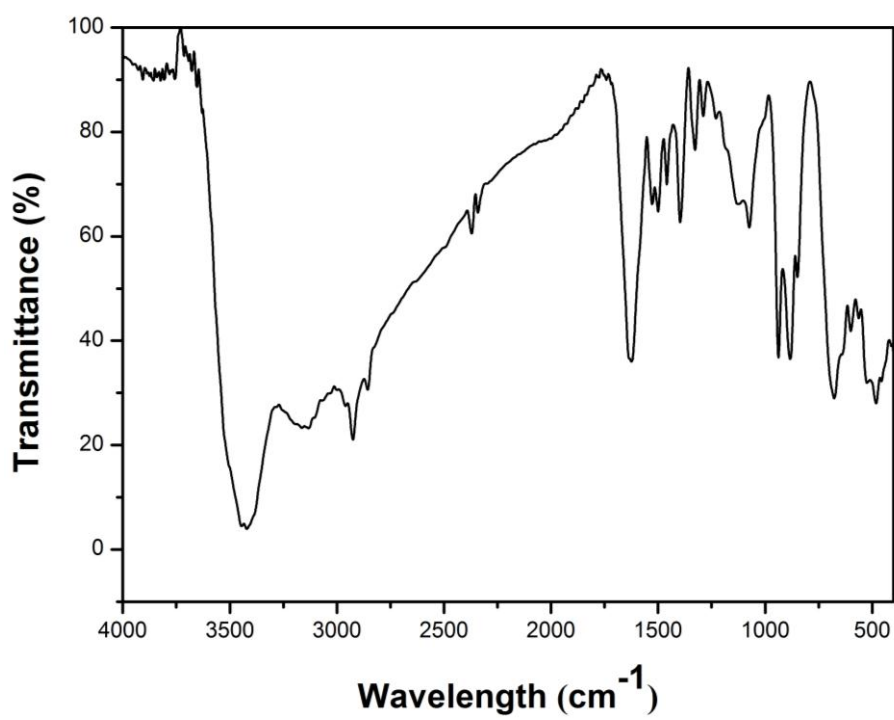

(f)

**Fig. S4** IR spectra for 1–6.

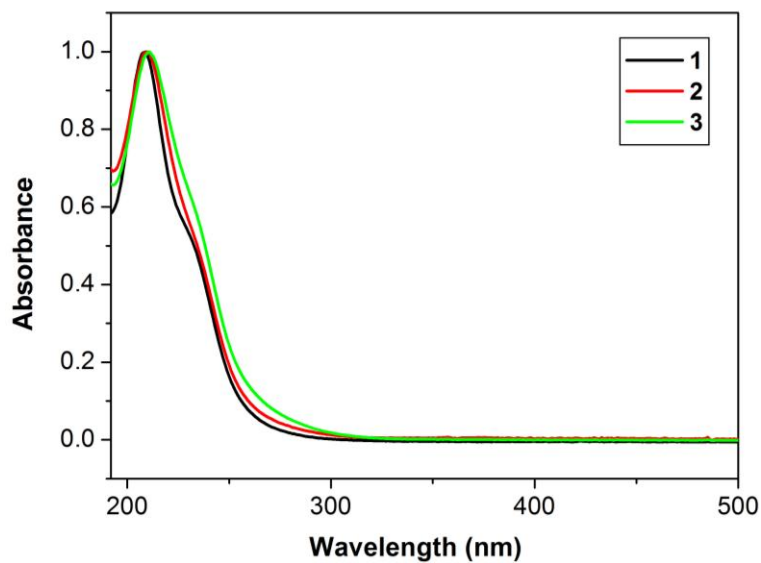

(a)

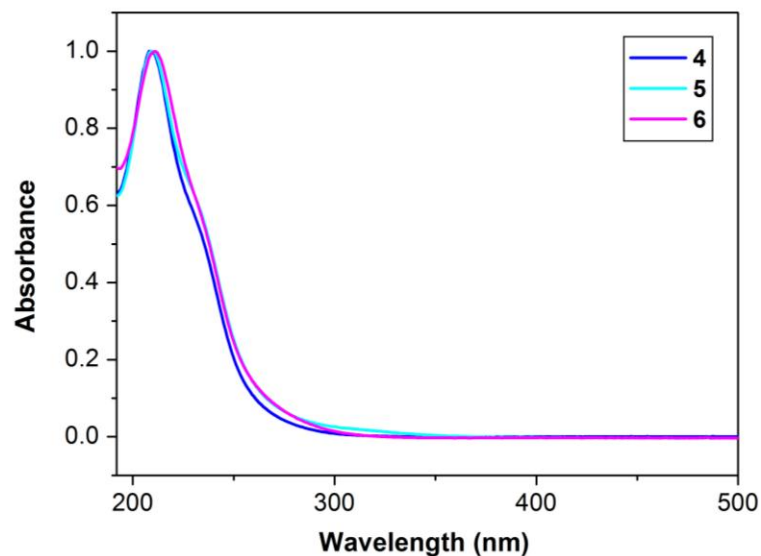

(b)

**Fig. S5** UV-vis spectra for **1–6**.

**Analysis:** The UV-vis spectra of compounds **1–6** are shown in Figure S5, ranging from 190 to 500 nm. The plots display two intense absorption bands for O→Mo charge transfer, which is characteristic of polyoxomolybdates. The strong bands at 209 nm for **1**, 210 nm for **2**, 210 nm for **3**, 209 nm for **4**, 210 nm for **5**, and 211 nm for **6** are attributed to Ot→Mo charge transfer transition; the weak bands at 231 nm for **1**, 232 nm for **2**, 232 nm for **3**, 232 nm for **4**, 233 nm for **5**, and 233 nm for **6** are assigned to the Ob,c→Mo charge transfer.

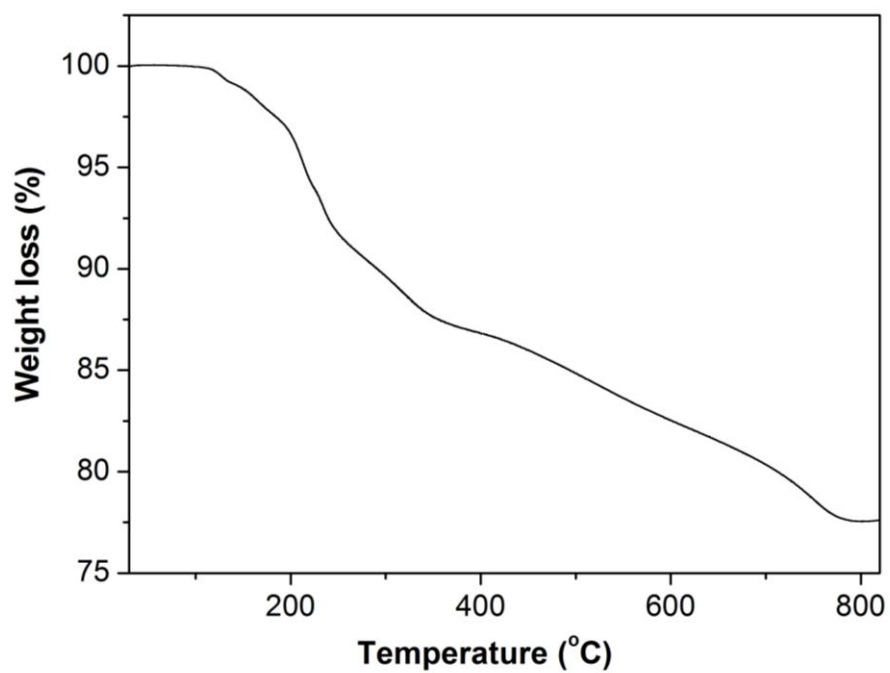

(a)

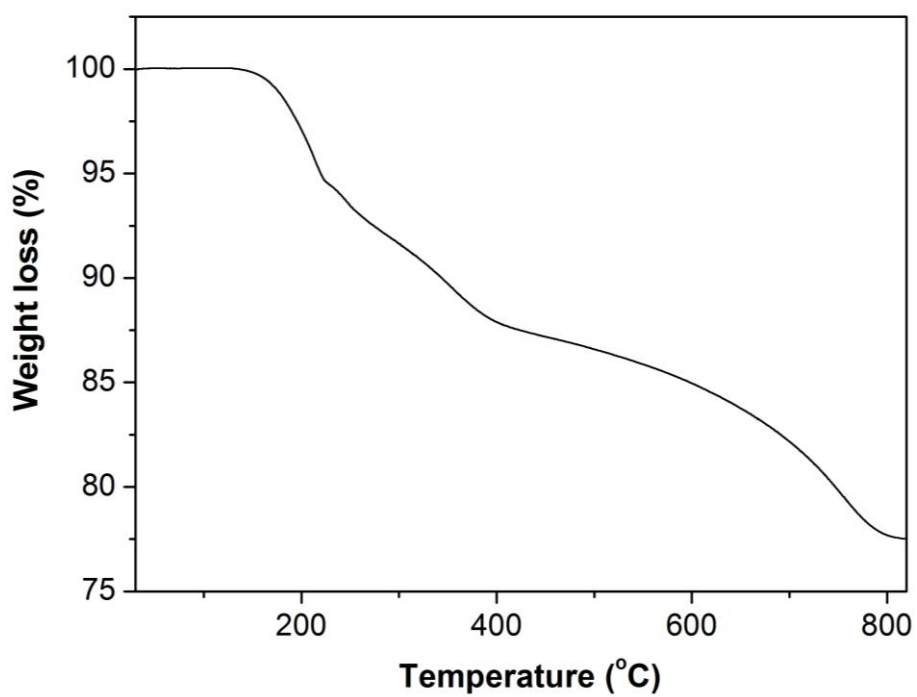

(b)

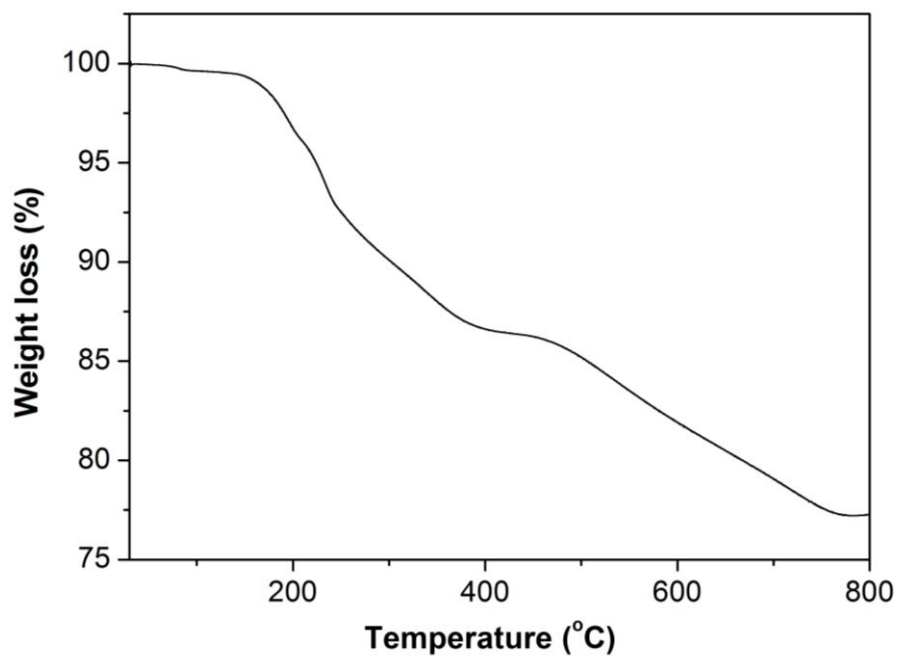

(c)

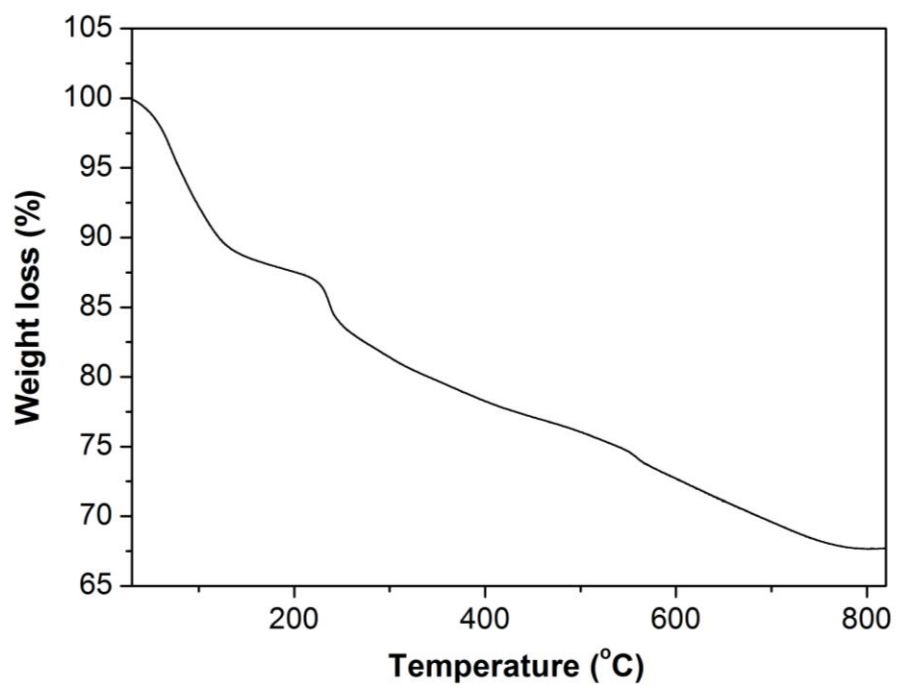

(d)



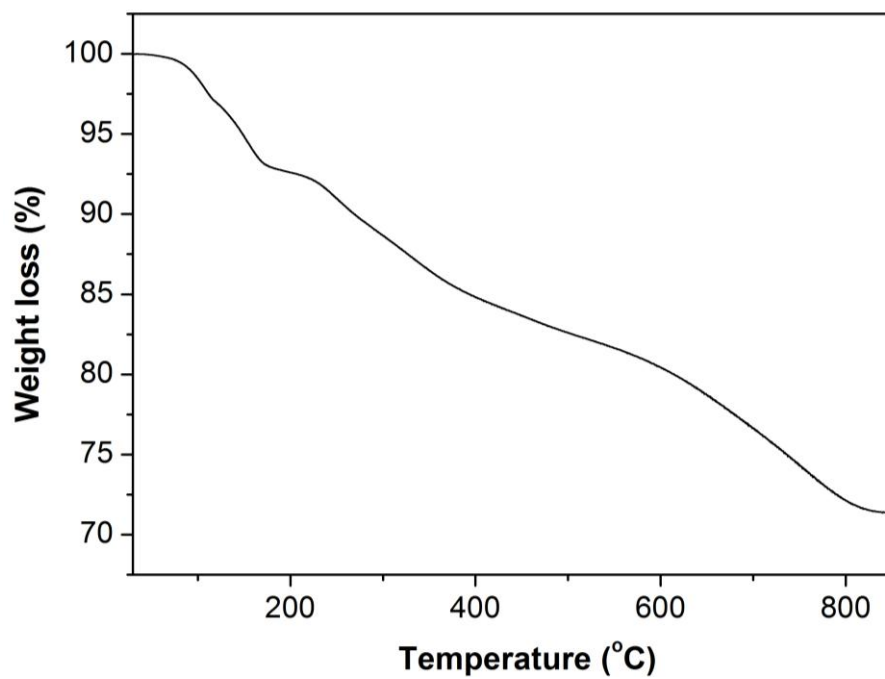

(e)

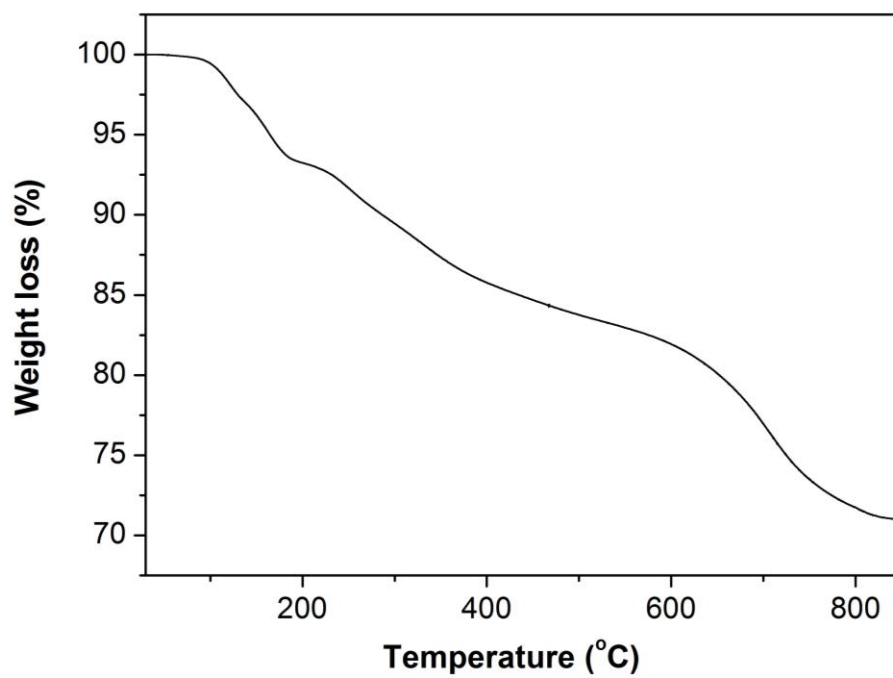

(f)

**Fig. S6** TG curves for 1–6.

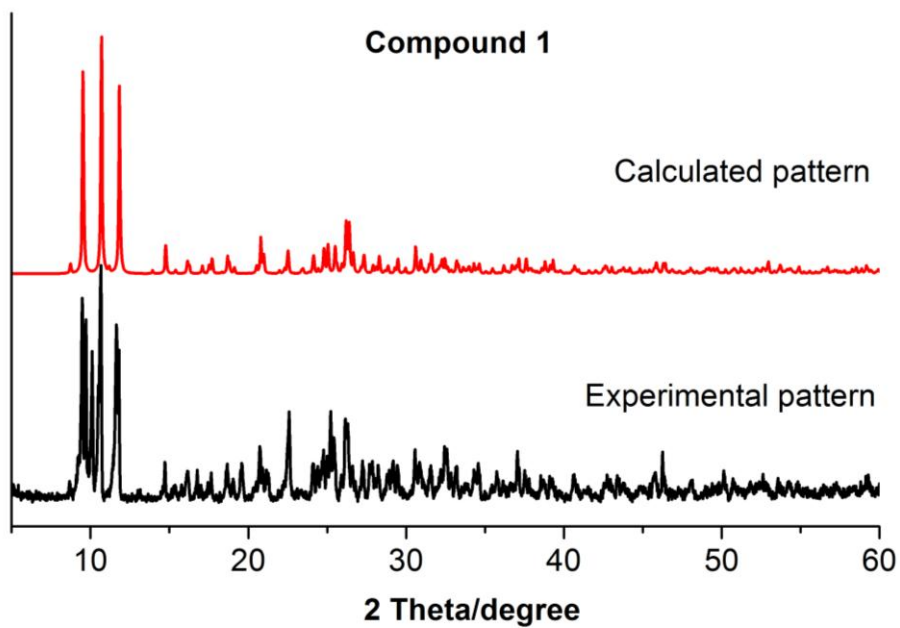

(a)

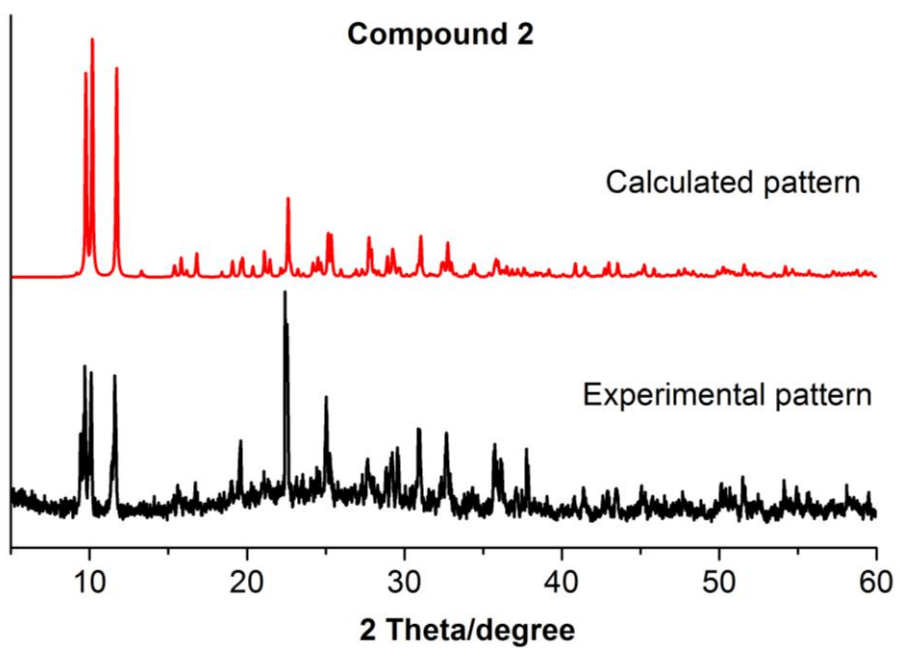

(b)

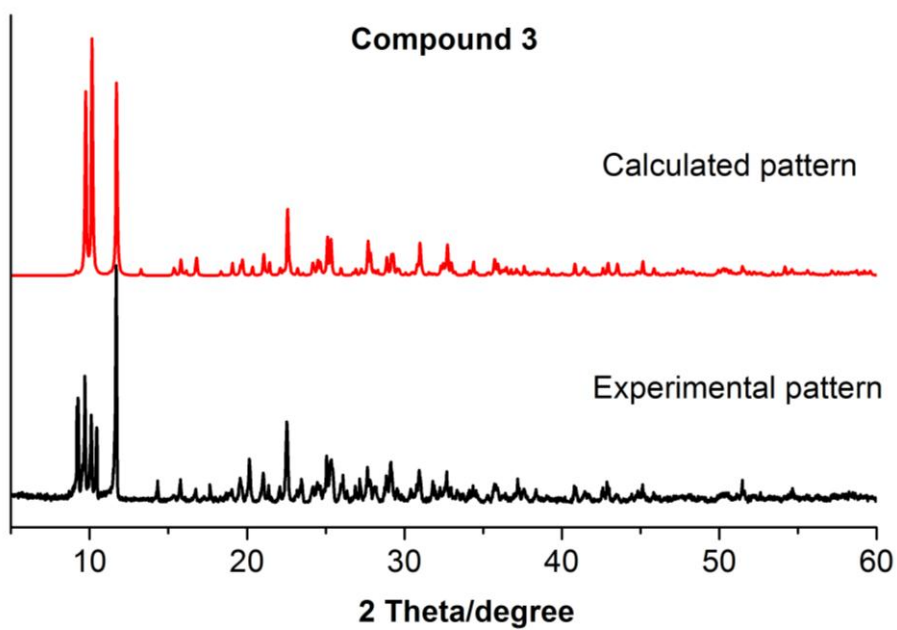

(c)

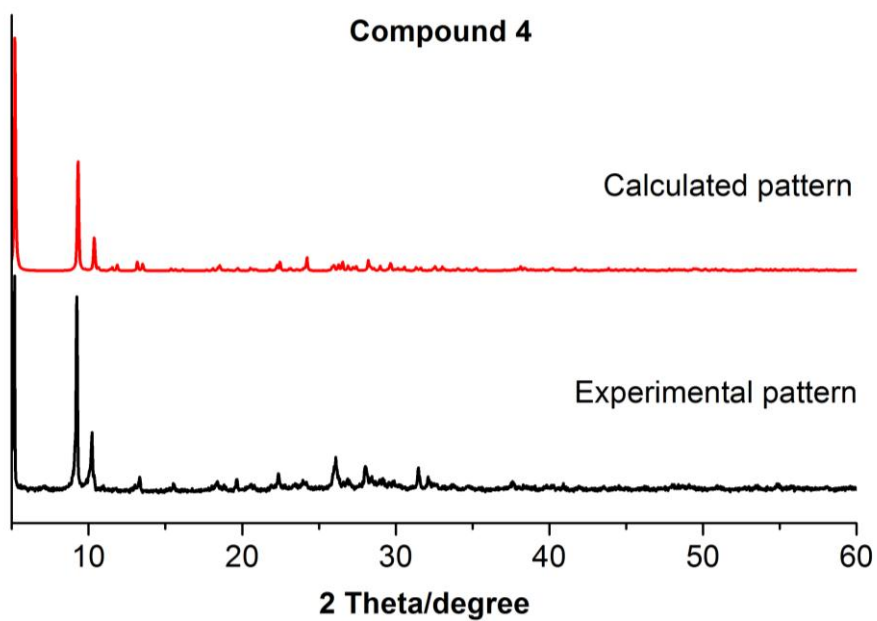

(d)

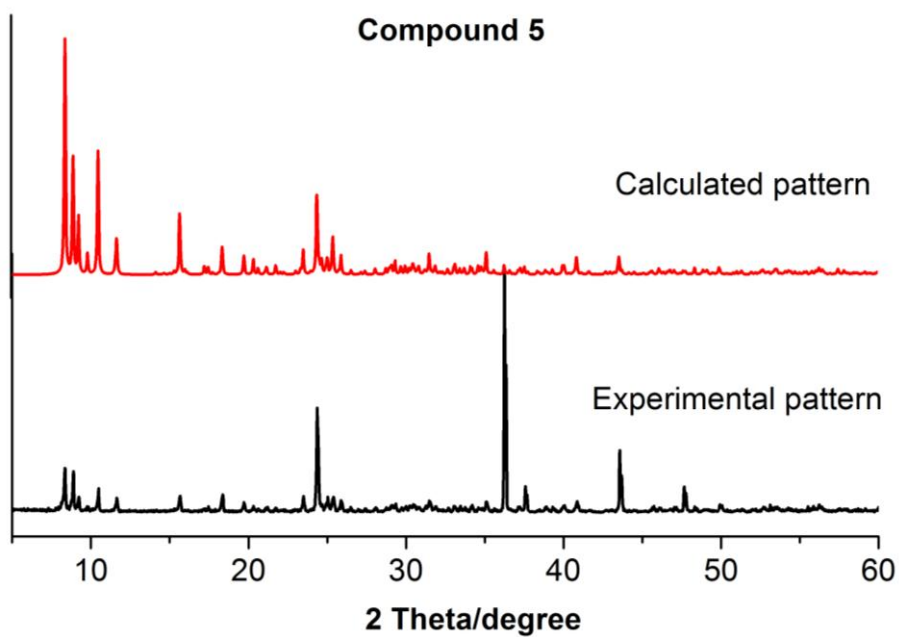

(e)

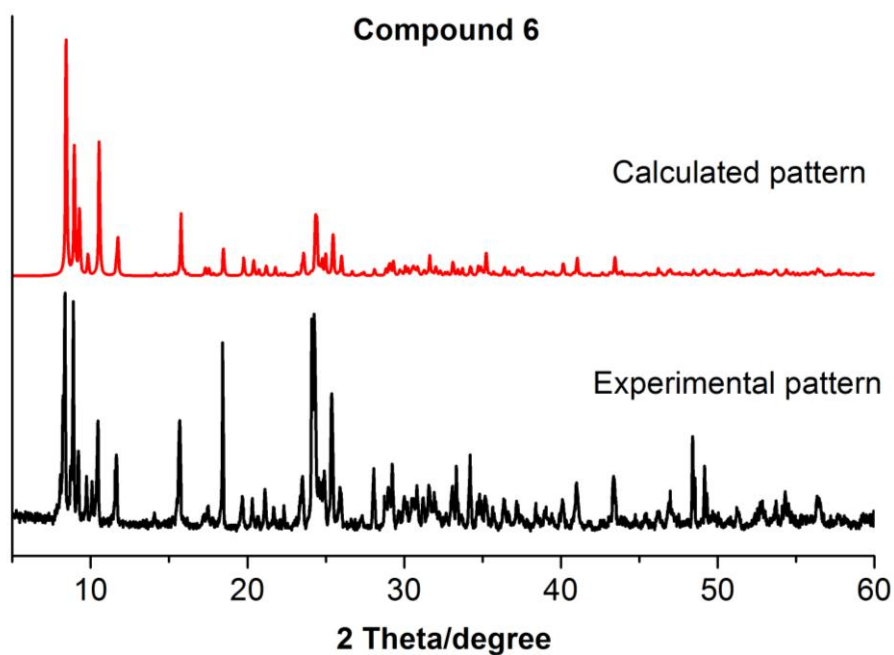

(f)

**Fig. S7** The calculated and experimental PXRD patterns for 1–6.

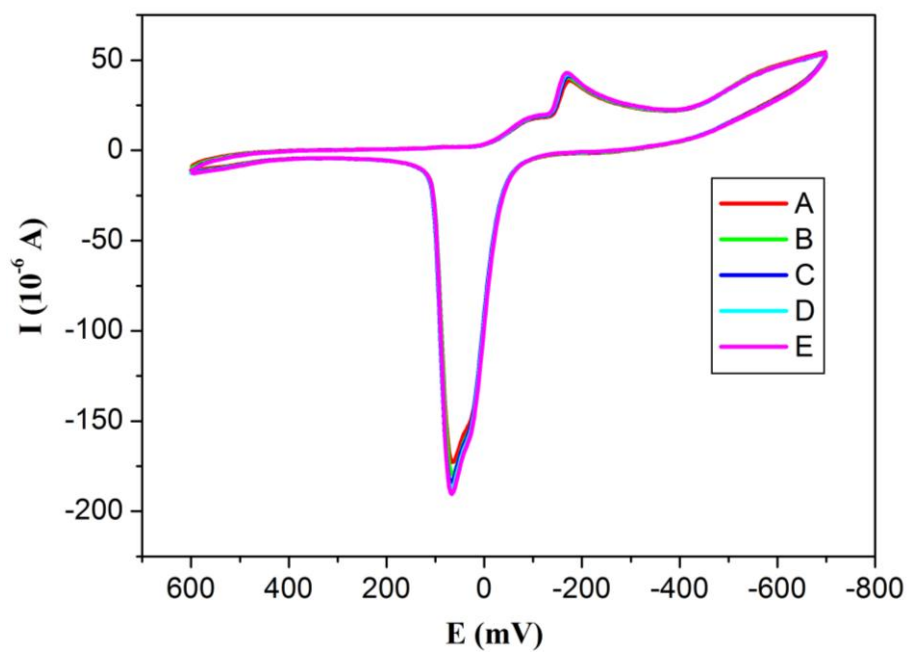

(a)

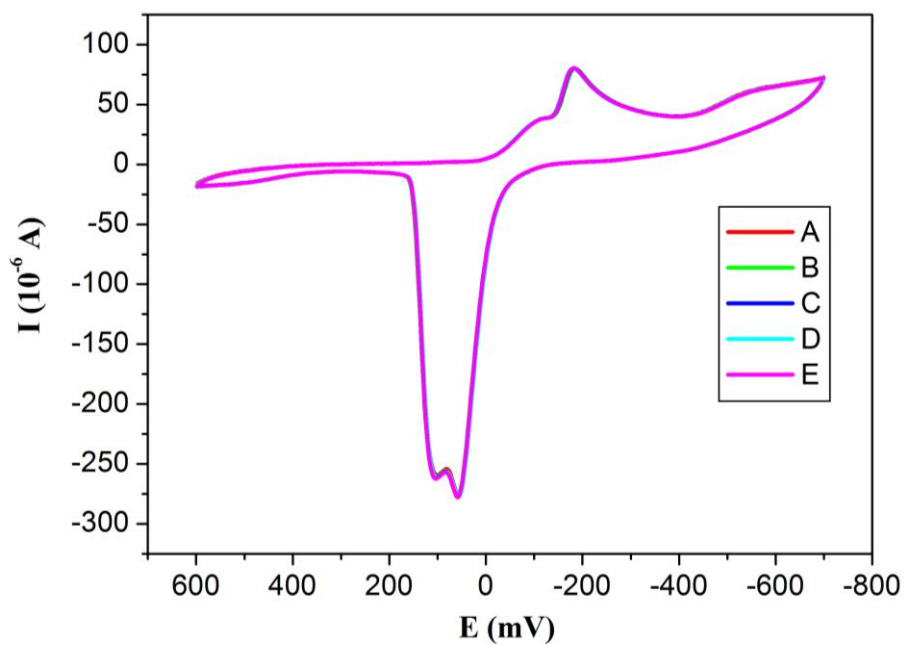

(b)

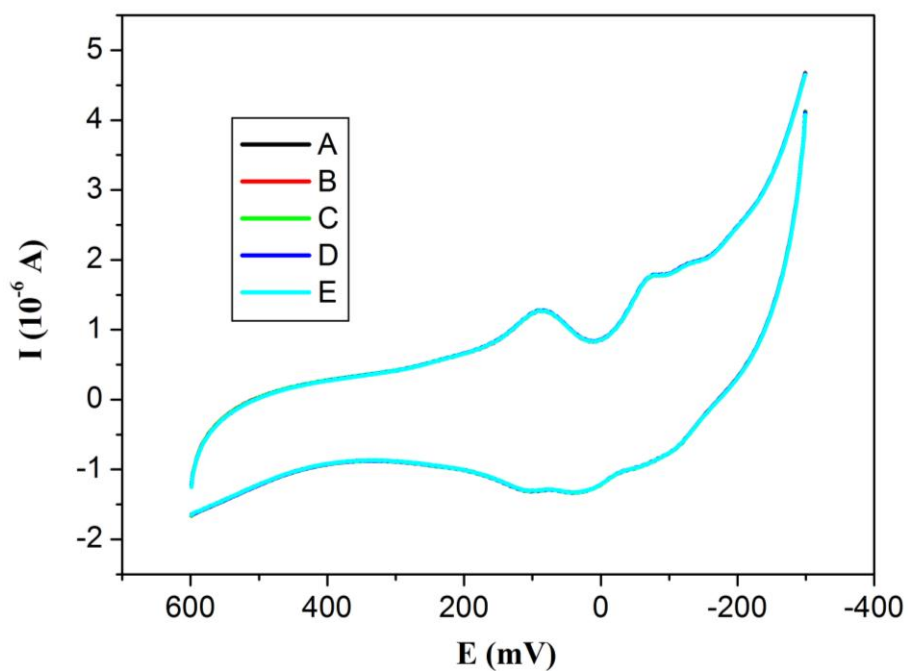

(c)

**Fig. S8** The CVs of **1**, **4** and **5** (0.5 mM) in a pH = 4 buffer solution (0.4M  $\text{CH}_3\text{COONa} + \text{CH}_3\text{COOH}$ ),  $200 \text{ mVs}^{-1}$  scan rate. The CV curves were detected every 24 hours, and totally detected five times. These CV curves remain almost unchanged.

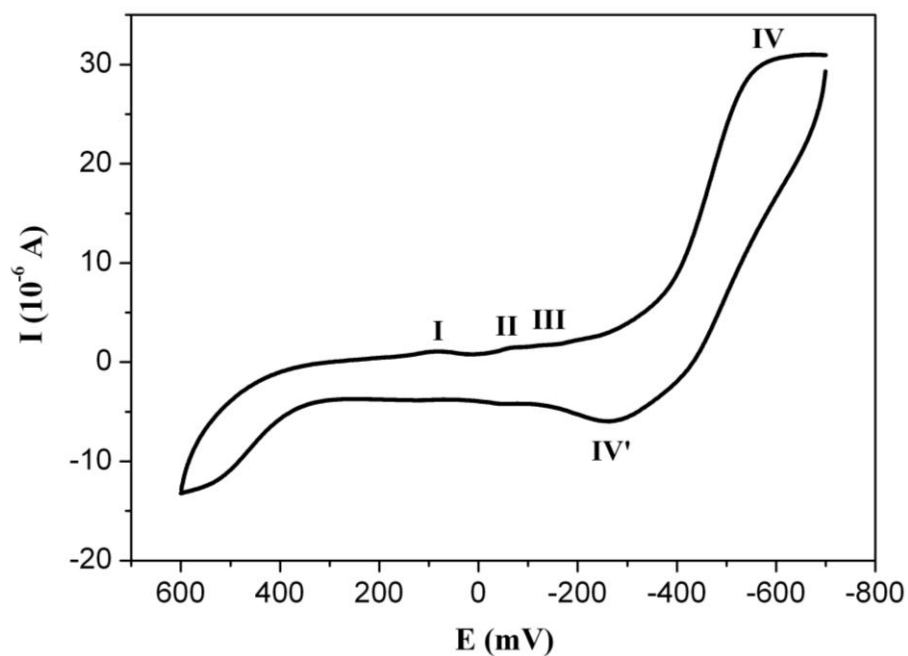

**Fig. S9** CV of 0.5 mM **5** in the potential range +0.600 to -0.700 V, pH 4.0 sodium acetate buffer, scan rate  $200 \text{ mV s}^{-1}$ , at ambient temperature.
